# Supplementary material for: Variation of physical durability between LLIN products and net use environments: summary of findings from four African countries
Source: PubMed Central journal article supplement (PMC7791654; doi:10.1186/s12936-020-03549-2), 2021-01-07

**Additional file 1**

**Figure:** adjusted survival curves for determinants of physical survival from cox regression

Legend **A:** high net care attitude and SBC exposure, blue: never-never, red: never-once+, green once-any, yellow: twice+-twice+; **B:** LLIN type, blue: polyester 100 denier, red: polyethylene150 denier; **C:** country: yellow: DRC, green: Zanzibar, blue Mozambique, red: Nigeria; **D:** wealth tertiles, blue: lowest, red: middle, green highest; **E:** folding net when hanging, blue: never, red: sometimes or always; **F:** cooking in sleeping room, blue: never, red: sometimes or always; **G:** net user: blue: children only, red: child and adult, green: adult only; **H:** gender of head of household: blue: male, red: female.

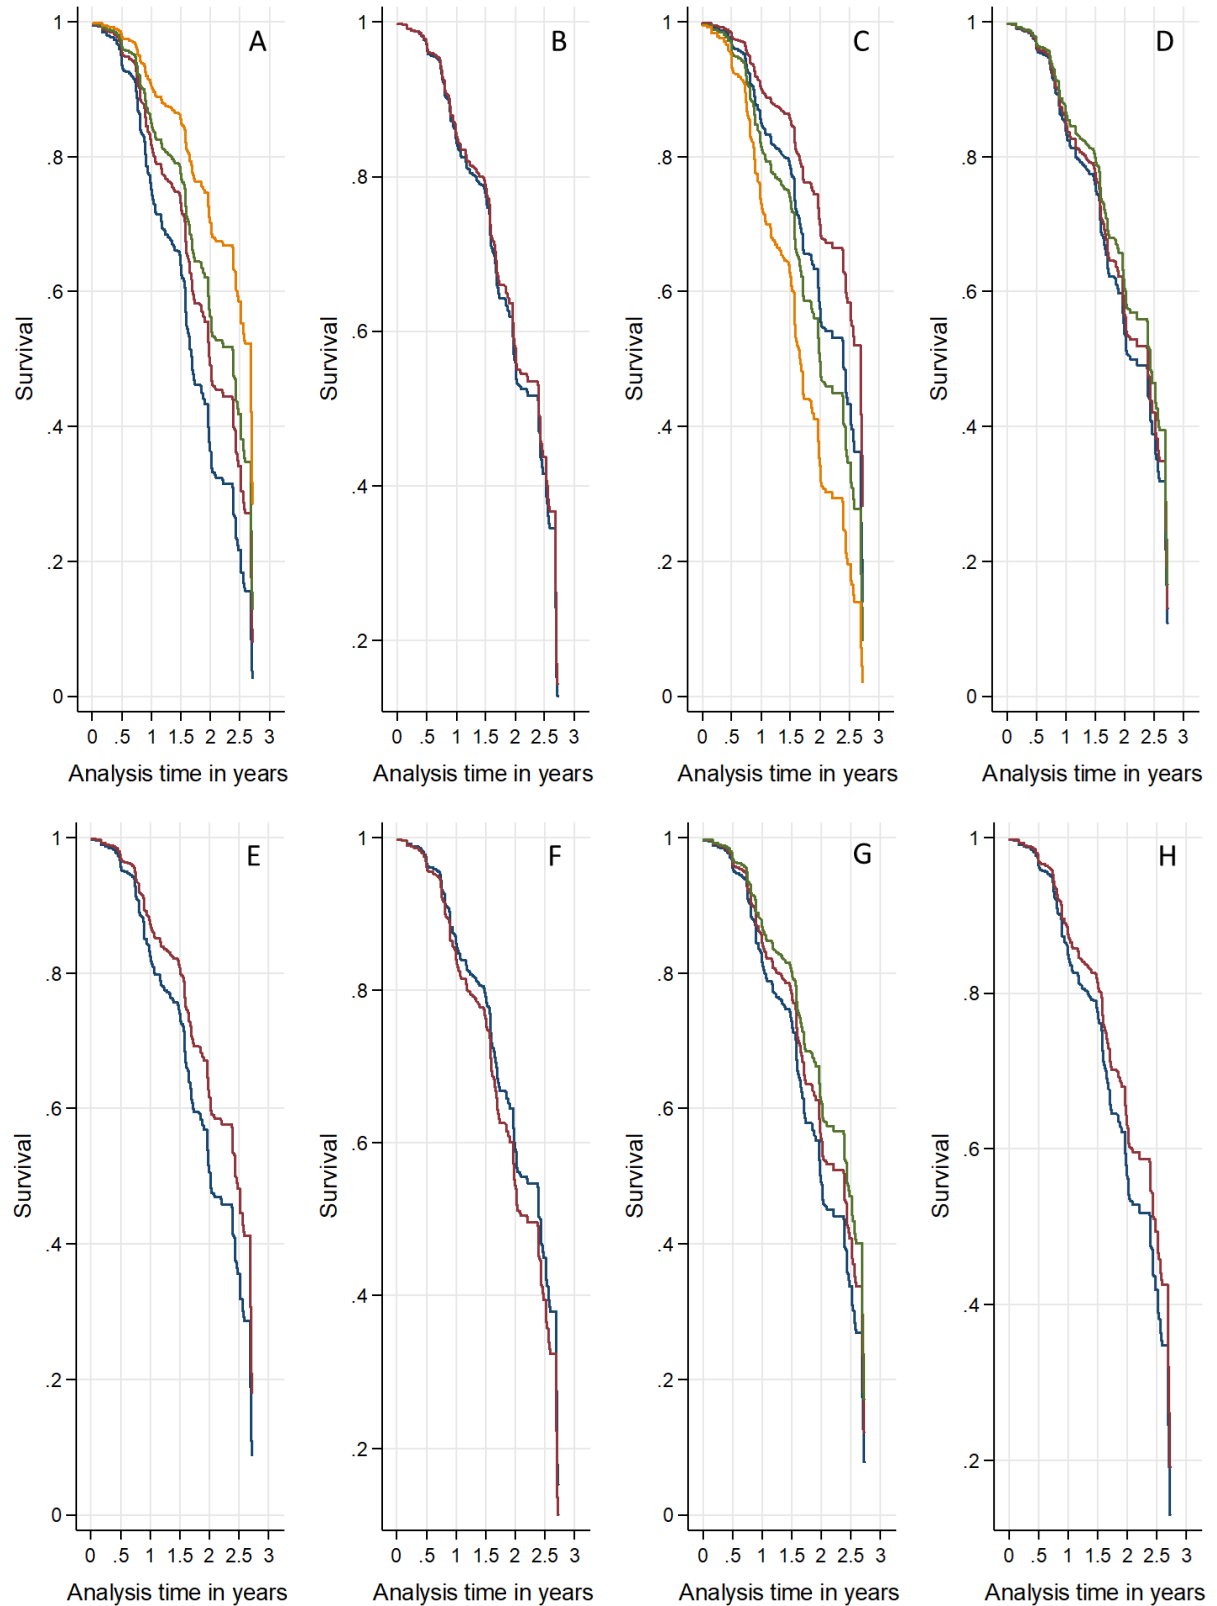

Supplement: 12936_2020_3549_MOESM1_ESM.pdf [file 12936_2020_3549_MOESM1_ESM.pdf]
